# Supplementary material for: The Antioxidant Dendrobium officinale Polysaccharide Modulates Host Metabolism and Gut Microbiota to Alleviate High-Fat Diet-Induced Atherosclerosis in ApoE−/− Mice
Source: MDPI journal article supplement (doi:10.3390/antiox13050599), 2024-05-13
Supplement: s1 [file s1]

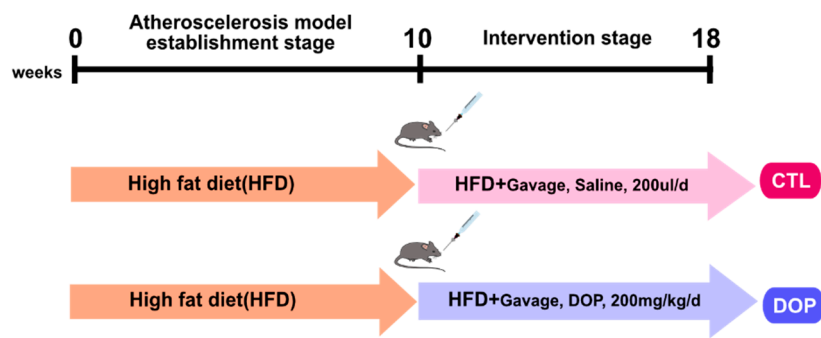

Supplementary Figure S1. Scheme of DOP intervention in HFD-induced atherosclerosis in ApoE<sup>-/-</sup> mice.

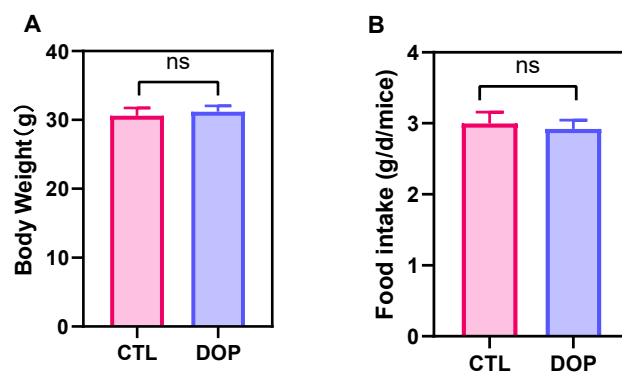

Supplementary Figure S2. Effects of DOP treatments on average body weight (A) and daily food intake (B) in ApoE<sup>-/-</sup> mice.

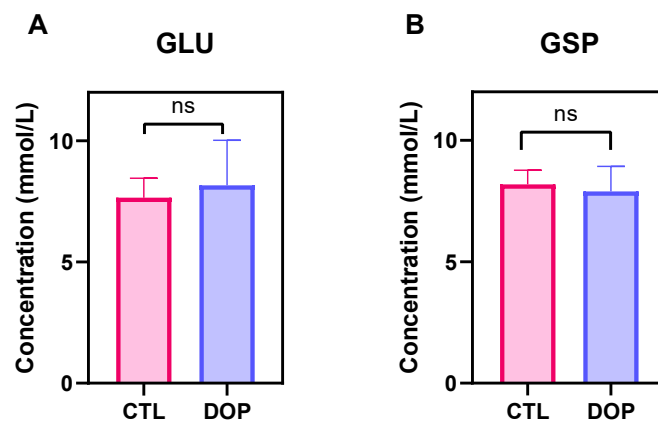

Supplementary Figure S3. Effects of DOP treatments on the levels of glucose (A) and glycosylated serum protein (GSP) (B).
