# Supplementary material for: The Antioxidant Dendrobium officinale Polysaccharide Modulates Host Metabolism and Gut Microbiota to Alleviate High-Fat Diet-Induced Atherosclerosis in ApoE−/− Mice
Source: MDPI journal article supplement (doi:10.3390/antiox13050599), 2024-05-13
Supplement: s1 [file s1]

**Supplementary Table S1. Target genes and primer sequences**

| Genes                           | Accession number | Forward (5'-3')        | Reverse (5'-3')       |
|---------------------------------|------------------|------------------------|-----------------------|
| <i>Tnf-<math>\alpha</math></i>  | NM_013693        | GCCGGACTCATCGTACTCC    | TTTGCTACGACGTGGGCTAC  |
| <i>Il1-<math>\beta</math></i>   | NM_008361        | TGCCACCTTTTGACAGTGATG  | TGCCACCTTTTGACAGTGATG |
| <i>Il-6</i>                     | NM_031168        | TGCCACCTTTTGACAGTGATG  | CGCACTAGGTTTGCCGAGTA  |
| <i>Arg1</i>                     | NM_007482        | CGCACTAGGTTTGCCGAGTA   | CGCACTAGGTTTGCCGAGTA  |
| <i>Mrc1</i>                     | NM_008625        | CGCACTAGGTTTGCCGAGTA   | TGTACCGCACCTCCATCTA   |
| <i>Retnla</i>                   | NM_020509        | GGGATGACTGCTACTGGGTG   | TCAACGAGTAAGCACAGGCA  |
| <i>Irf4</i>                     | NM_013674        | GCCAGCCCAGGTTTCATAACTA | TGGGGCACAAGCATAAAAGGT |
| <i><math>\beta</math>-Actin</i> | NM_007393        | GTGACGTTGACATCCGTAAAGA | GCCGGACTCATCGTACTCC   |

**Supplementary Table S2. Molecular weight and monosaccharide composition of DOP**

| Items                                | Mount   |
|--------------------------------------|---------|
| Number average molecular weight (Mn) | 1080    |
| Weight average molecular weight (Mw) | 4538    |
| Z average molecular weight (Mz)      | 34407   |
| Mw/Mn                                | 4.20476 |
| Mz/Mw                                | 7.58021 |
| Glycosyl composition                 |         |
| Mannose                              | 1.16    |
| glucose                              | 1       |
